# Supplementary material
Source: PubMed Central journal article supplement (PMC6699064)
Supplement: mmc1.pdf [file mmc1.pdf]

**The American Journal of Human Genetics, Volume 105**

**Supplemental Data**

**Phenome-wide Burden of Copy-Number Variation  
in the UK Biobank**

**Matthew Aguirre, Manuel A. Rivas, and James Priest**

## Supplementary Figures and Tables:

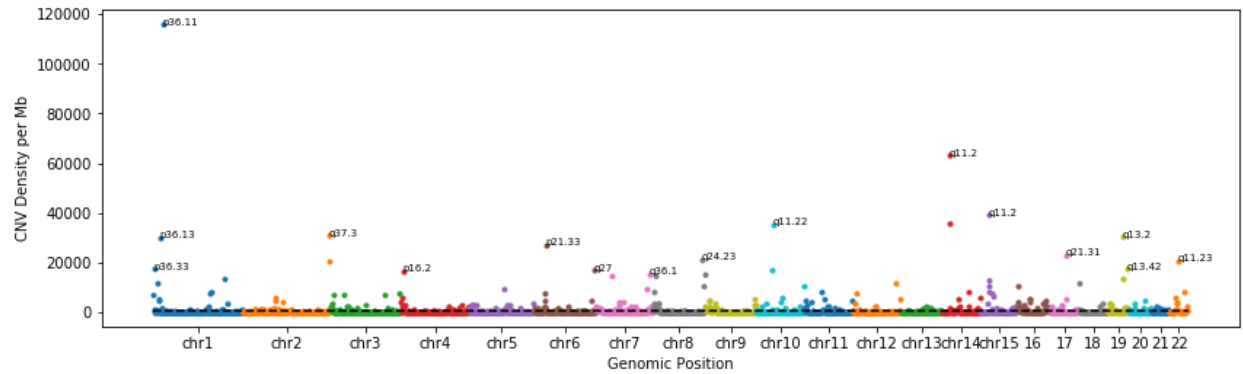

**Figure S1: CNV density weighted by allele count in UK Biobank.** Per-megabase genomic density of CNV, weighted by number of observations across all samples in UK Biobank. Variants are counted by whether the CNV has any overlap with 10 megabase (Mb) windows tiling each chromosome. Selected hotspots of structural variation are labeled by the region's corresponding cytogenic band.

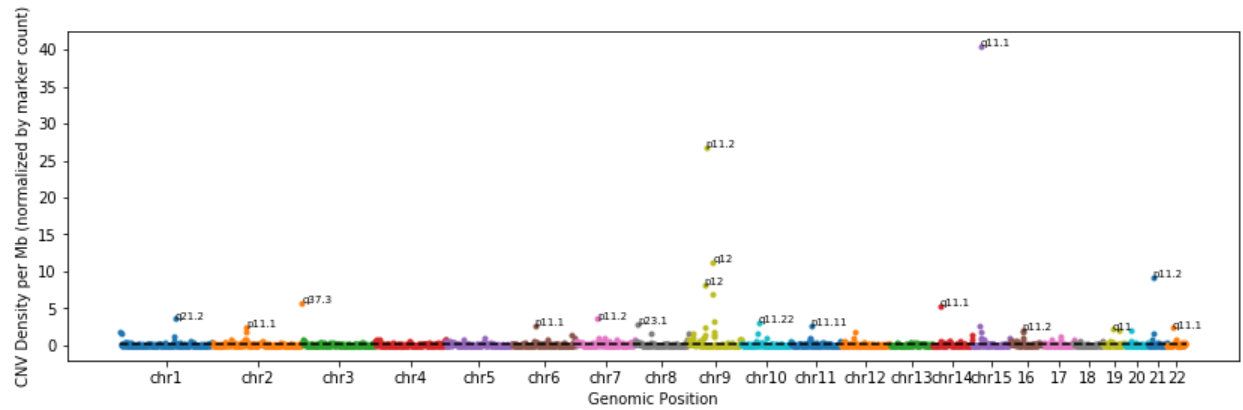

**Figure S2: CNV density normalized by array marker density in UK Biobank.** Variants are counted by whether the CNV has any overlap with 10 megabase (Mb) windows tiling each chromosome, then divided by the number of markers in the window. Regions with no array markers are defined to have density of zero. Selected hotspots of structural variation are labeled by the region's corresponding cytogenetic band.

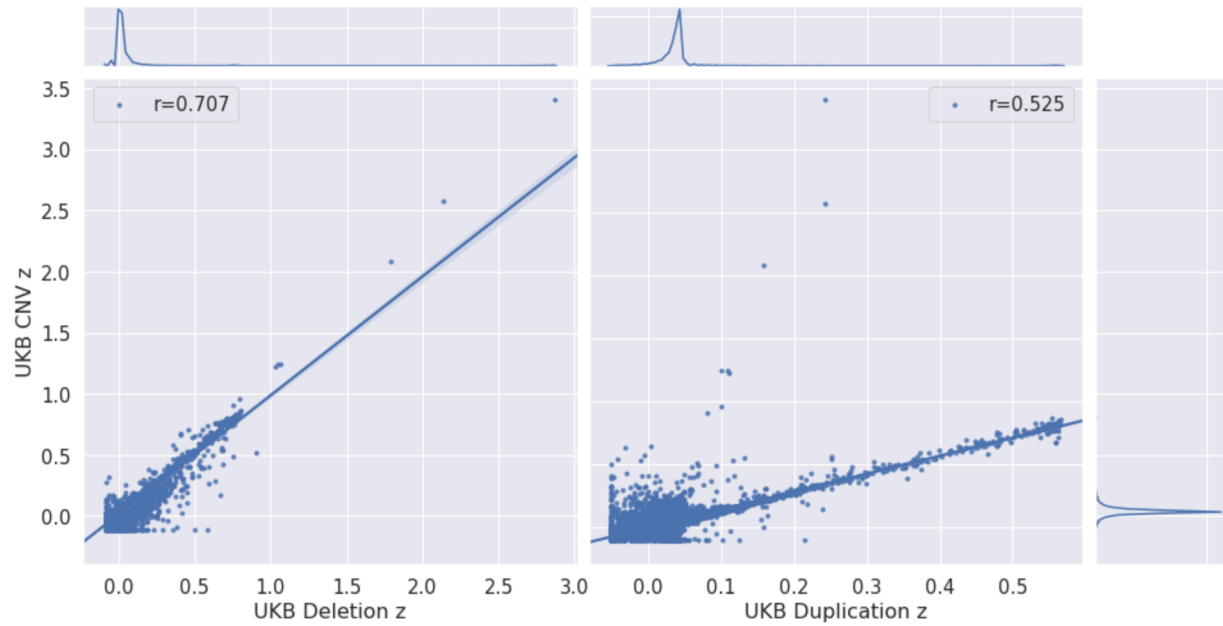

**Figure S3: Distribution of deletion- and whole-gene duplication-specific constraint scores from UK Biobank.** Correlation between intolerance measures for partial-gene deletion, whole-gene duplication, and CNV burden. The legend for each panel denotes correlation (Spearman's  $r$ ) between burden-constraint and each other measure. Kernel density estimates for each distribution of constraint scores are in the panels opposite their corresponding axis labels.

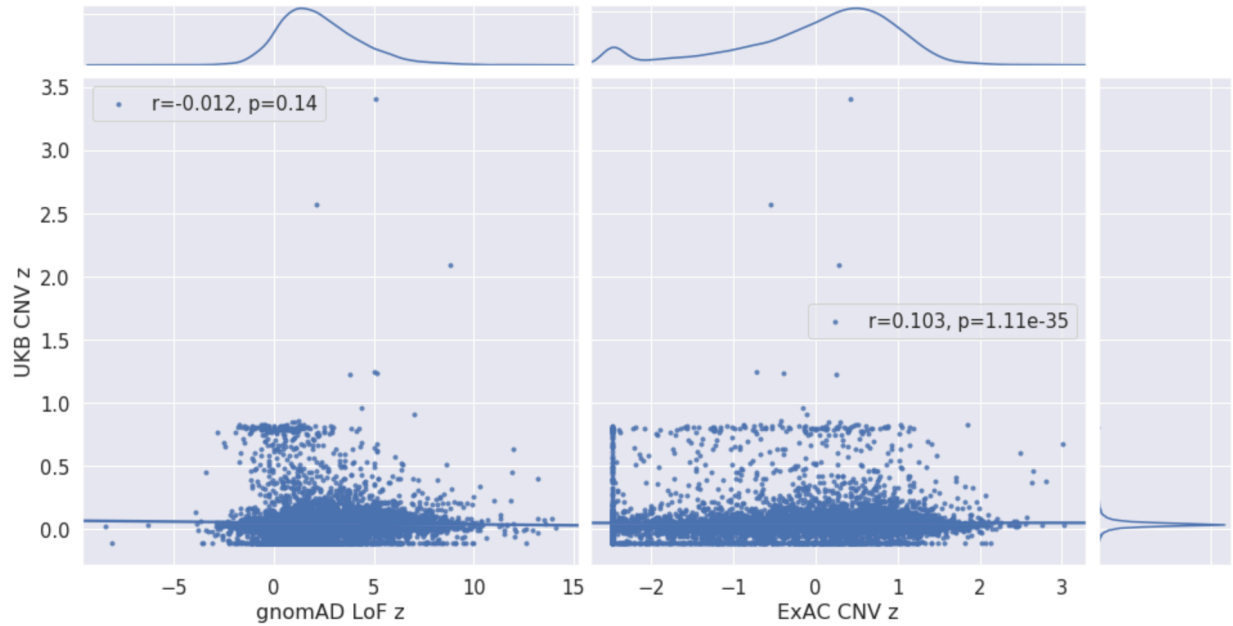

**Figure S4: Distribution of constraint z-scores from UK Biobank and ExAC/gnomAD.** Our measures of gene-level intolerance to structural variation show nominal correlation with gnomAD loss of function constraint z-scores (Spearman's  $r = -0.012$ , left), and modest correlation with CNV-intolerance in ExAC (Spearman's  $r = 0.103$ , right panel). Gaussian kernel density estimates for each distribution of z-scores are opposite their corresponding axes.

While correlation between constraint measures across datasets is non-random, we suspect cohort-specific effects and varying definitions of genic burden of variation drive these departures. As a cohort of predominantly healthy adults, intolerance to variation in UK Biobank constraint is driven by severe early onset disease, while the same measures in ExAC/gnomAD, whose samples have a more diverse age range and relatively higher burden of disease, highlight genes involved with fundamental biological processes whose loss of function likely confer phenotypic consequences causing embryonic lethality.

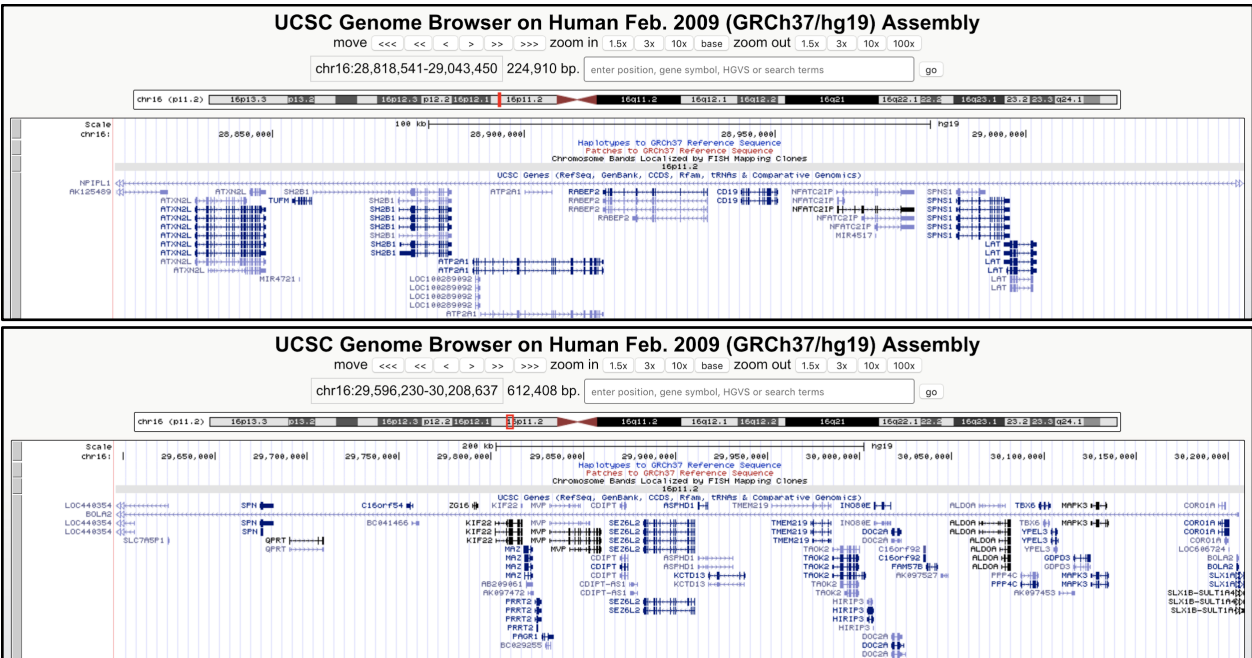

**Figure S5: Location of 16p11.2 Deletions.** UCSC Genome Browser tracks for 220kb (top panel) and 593kb (bottom panel) CNVs at Chr16q11.2.

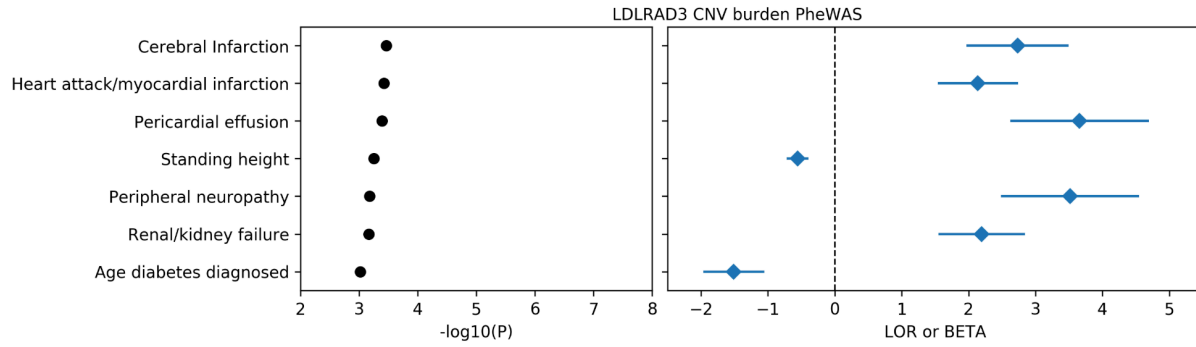

**Figure S6: *LDLRAD3* burden test PheWas.** Significant ( $p < 10^{-3}$ ) associations between regularized burden tests for *LDLRAD3* CNV and phenotypes. We highlight quantitative traits with  $n > 15,000$  observations and binary traits with  $n > 500$  cases. Traits are grouped by data type then sorted by  $p$ -value (left). Log-odds ratio and standardized betas (right; for binary and quantitative traits, respectively) align with trait names on the y-axis, with the vertical dashed line separating positive and negative direction of association.

# UCSC Genome Browser on Human Feb. 2009 (GRCh37/hg19) Assembly

move <<< << < > >> >>> zoom in 1.5x 3x 10x base zoom out 1.5x 3x 10x 100x

chr11:35,955,612-36,262,841 307,230 bp. enter position, gene symbol, HGVS or search terms go

chr11 (p13) p15.4 15.1 p13 11p12 11.2 13.4 11q14.1 q21 22.1 q22.3 q23.3 q25

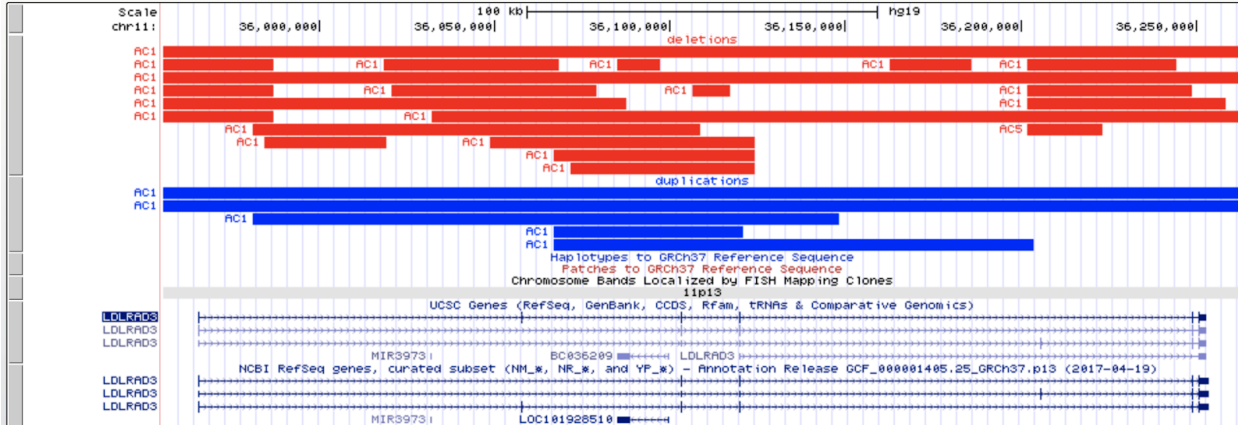

**Figure S7: LDLRAD3 burden test CNVs.** Chromosomal location of all CNVs considered for the *LDLRAD3* burden test, with respective allele count in the population used for association. Deletions are in red, duplications in blue. CNVs which extend beyond this locus are pruned at the edges of the 10kb padded window of *LDLRAD3* used for the burden test.



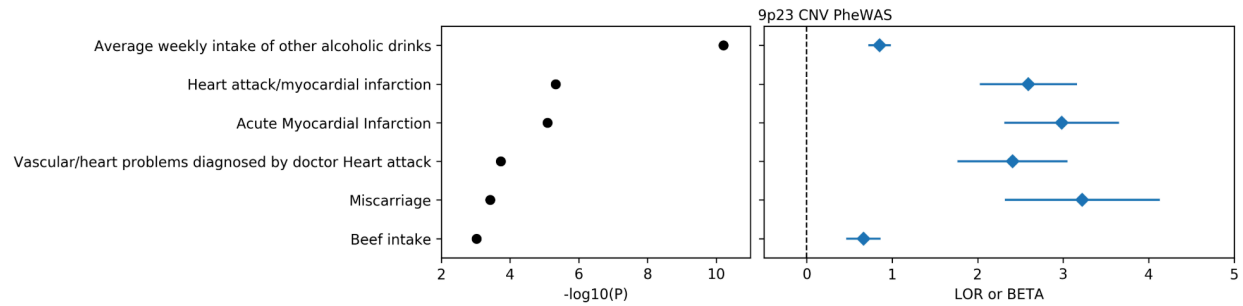

**Figure S8: 9p23 CNV PheWAS.** Significant ( $p < 10^{-3}$ ) associations between regularized burden tests for 9p23 CNV (top hit from Acute CAD GWAS) and other phenotypes. We highlight quantitative traits with  $n > 15,000$  observations and binary traits with  $n > 500$  cases. Traits are grouped by data type then sorted by  $p$ -value (left). Log-odds ratio and standardized betas (right; for binary and quantitative traits, respectively) align with trait names on the y-axis, with the vertical dashed line separating positive and negative direction of association.

| Gene      | Deletion z | Deletion pLI | Gene      | Duplication z | Duplication pLI |
|-----------|------------|--------------|-----------|---------------|-----------------|
| BRCA2     | 2.870      | 0.9834       | HLA-DRB1  | 0.566         | 0.9970          |
| BRCA1     | 2.136      | 0.9578       | FRG2B     | 0.565         | 1.0000          |
| APC       | 1.790      | 0.9463       | SPATA31D1 | 0.565         | 0.9985          |
| ATM       | 1.063      | 0.9790       | SLC35G6   | 0.565         | 1.0000          |
| MSH2      | 1.048      | 0.9843       | NAT8      | 0.565         | 1.0000          |
| MLH1      | 1.033      | 0.9985       | TUBB8     | 0.564         | 1.0000          |
| MYH7      | 0.902      | 0.8711       | CSH2      | 0.564         | 1.0000          |
| PMS2      | 0.858      | 0.9027       | ZNF302    | 0.564         | 1.0000          |
| SBDS      | 0.800      | 0.9670       | CSHL1     | 0.564         | 1.0000          |
| CYP3A4    | 0.799      | 0.9962       | GH1       | 0.564         | 1.0000          |
| SPATA31D1 | 0.799      | 0.9962       | CGB2      | 0.564         | 1.0000          |
| TTN       | 0.798      | 0.9669       | OR4F17    | 0.564         | 1.0000          |
| OTOP1     | 0.793      | 0.9962       | CGB5      | 0.564         | 1.0000          |
| MSH6      | 0.792      | 0.9924       | CGB7      | 0.564         | 1.0000          |
| FAM205A   | 0.790      | 0.9905       | GH2       | 0.564         | 1.0000          |

**Table S1: Deletion- and whole-gene duplication-specific selective constraint.** 15 genes most intolerant to overlapping deletion (left), and whole-gene duplication (right), with respective constraint z-scores.

| GO ID      | Deletion-intolerant Pathway Name                 | Delta z | P        |
|------------|--------------------------------------------------|---------|----------|
| GO:0045095 | keratin filament                                 | 0.229   | 3.00E-27 |
| GO:0000137 | Golgi cis cisterna                               | 0.351   | 4.14E-25 |
| GO:0005515 | protein binding                                  | 0.055   | 3.09E-19 |
| GO:0008194 | UDP-glycosyltransferase activity                 | 0.314   | 4.03E-17 |
| GO:0052697 | xenobiotic glucuronidation                       | 0.423   | 1.22E-16 |
| GO:0000800 | lateral element                                  | 0.380   | 3.54E-16 |
| GO:0031424 | keratinization                                   | 0.147   | 1.36E-15 |
| GO:0042954 | lipoprotein transporter activity                 | 0.397   | 5.36E-15 |
| GO:0015020 | glucuronosyltransferase activity                 | 0.293   | 1.47E-13 |
| GO:0005131 | growth hormone receptor binding                  | 0.492   | 1.36E-12 |
| GO:0008202 | steroid metabolic process                        | 0.231   | 2.55E-12 |
| GO:0046703 | natural killer cell lectin-like receptor binding | 0.377   | 2.69E-12 |
| GO:0008274 | gamma-tubulin ring complex                       | 0.308   | 6.07E-12 |
| GO:0035459 | cargo loading into vesicle                       | 0.348   | 4.19E-11 |
| GO:0070531 | BRCA1-A complex                                  | 0.692   | 1.09E-10 |

| GO ID      | Duplication-intolerant Pathway Name                         | Delta z | P        |
|------------|-------------------------------------------------------------|---------|----------|
| GO:0000137 | Golgi cis cisterna                                          | 0.333   | 3.59E-44 |
| GO:0045095 | keratin filament                                            | 0.190   | 3.19E-33 |
| GO:0005515 | protein binding                                             | 0.049   | 4.32E-31 |
| GO:0031424 | keratinization                                              | 0.134   | 1.49E-22 |
| GO:0008202 | steroid metabolic process                                   | 0.215   | 1.99E-21 |
| GO:0005801 | cis-Golgi network                                           | 0.167   | 2.46E-18 |
| GO:0046703 | natural killer cell lectin-like receptor binding            | 0.362   | 4.47E-18 |
| GO:0008194 | UDP-glycosyltransferase activity                            | 0.235   | 4.16E-17 |
| GO:0005132 | type I interferon receptor binding                          | 0.244   | 1.79E-15 |
| GO:0052697 | xenobiotic glucuronidation                                  | 0.290   | 8.34E-15 |
| GO:0005131 | growth hormone receptor binding                             | 0.375   | 1.19E-14 |
| GO:0042271 | susceptibility to natural killer cell mediated cytotoxicity | 0.237   | 2.17E-14 |
| GO:0042954 | lipoprotein transporter activity                            | 0.283   | 5.69E-14 |
| GO:0002323 | natural killer cell activation involved in immune response  | 0.246   | 1.30E-13 |
| GO:0008395 | steroid hydroxylase activity                                | 0.152   | 2.98E-13 |

**Table S2: Deletion- and whole-gene duplication-specific pathway constraint.** GO pathways most intolerant to overlapping deletion (top), and whole-gene duplication (bottom), with change in constraint z-scores and significance thereof (t-test) relative to other pathways.

| HPO ID     | Deletion-intolerant HPO Term    | Delta z | P        |
|------------|---------------------------------|---------|----------|
| HP:0006725 | Pancreatic adenocarcinoma       | 0.469   | 1.22E-36 |
| HP:0012432 | Chronic fatigue                 | 0.631   | 2.91E-32 |
| HP:0025318 | Ovarian carcinoma               | 0.576   | 9.38E-32 |
| HP:0003003 | Colon cancer                    | 0.343   | 2.55E-30 |
| HP:0004389 | Intestinal pseudo-obstruction   | 0.576   | 2.83E-29 |
| HP:0100273 | Neoplasm of the colon           | 0.291   | 4.29E-27 |
| HP:0100787 | Prostate neoplasm               | 0.417   | 6.41E-26 |
| HP:0012125 | Prostate cancer                 | 0.417   | 6.41E-26 |
| HP:0030406 | Primary peritoneal carcinoma    | 0.488   | 3.38E-24 |
| HP:0100834 | Neoplasm of the large intestine | 0.241   | 1.76E-23 |
| HP:0012334 | Extrahepatic cholestasis        | 0.480   | 2.44E-23 |
| HP:0003002 | Breast carcinoma                | 0.267   | 2.69E-22 |
| HP:0009592 | Astrocytoma                     | 0.449   | 9.80E-22 |
| HP:0100707 | Abnormality of the astrocytes   | 0.449   | 9.80E-22 |
| HP:0002885 | Medulloblastoma                 | 0.444   | 3.32E-21 |

| HPO ID     | Duplication-intolerant HPO Term                         | Delta z  | P        |
|------------|---------------------------------------------------------|----------|----------|
| HP:0000707 | Abnormality of the nervous system                       | 0.039649 | 3.10E-17 |
| HP:0012638 | Abnormality of nervous system physiology                | 0.039371 | 1.93E-16 |
| HP:0012759 | Neurodevelopmental abnormality                          | 0.03731  | 5.04E-15 |
| HP:0000007 | Autosomal recessive inheritance                         | 0.039233 | 2.08E-14 |
| HP:0012639 | Abnormality of nervous system morphology                | 0.038852 | 5.67E-14 |
| HP:0003011 | Abnormality of the musculature                          | 0.038621 | 9.58E-14 |
| HP:0012373 | Abnormal eye physiology                                 | 0.037309 | 9.81E-14 |
| HP:0000478 | Abnormality of the eye                                  | 0.039384 | 1.16E-13 |
| HP:0100022 | Abnormality of movement                                 | 0.036173 | 6.27E-13 |
| HP:0012758 | Neurodevelopmental delay                                | 0.036116 | 8.81E-13 |
| HP:0001249 | Intellectual disability                                 | 0.035805 | 1.02E-12 |
| HP:0012443 | Abnormality of brain morphology                         | 0.037981 | 1.32E-12 |
| HP:0002011 | Morphological abnormality of the central nervous system | 0.039044 | 2.08E-12 |
| HP:0011842 | Abnormality of skeletal morphology                      | 0.039995 | 2.24E-12 |
| HP:0000924 | Abnormality of the skeletal system                      | 0.040534 | 4.56E-12 |

**Table S3: Deletion- and whole-gene duplication-specific medical term constraint.** HPO terms most intolerant to overlapping deletion (top), and whole-gene duplication (bottom), with change in constraint z-scores and significance thereof (t-test) relative to other pathways.
